# Supplementary material for: Putting Temperature and Oxygen Thresholds of Marine Animals in Context of Environmental Change: A Regional Perspective for the Scotian Shelf and Gulf of St. Lawrence
Source: PLoS One. 2016 Dec 20;11(12):e0167411. doi: 10.1371/journal.pone.0167411 (PMC5172530; doi:10.1371/journal.pone.0167411)
Supplement: S2 Table — Each row reports data for one species, life stage (if available), and source reference. Latin name, common name, and habitat zone (pelagic, demersal, benthic, infaunal) are given, followed by the temperature categories of minimim and maximum temperature, preferred temperature, intolerant temperature, and lethal temperature. The notes indicate specific location and species impacts, if available. (XLS) [file pone.0167411.s002.xls]

## Sheet: Sheet1
S2 Table. Temperature levels of Scotian Shelf and Gulf of St. Lawrence marine species identified from literature survey
Each row reports data for one species, lifestage (if available), and source reference. Latin name, common name, lifestage (if available), and habitat zone (pelagic, demersal, benthic, infaunal) are given, followed by the temperature categories of minimim and maximum temperature range,
preferred temperature, intolerant temperature, and lethal temperature. The notes indicate specific location and species impacts, if available.
Latin Name	Common Name	Lifestage	Zone	Min temp	Max temp	Min pref	Max pref	Min intolerant	Max intolerant	Lower lethal	Upper lethal	Notes	Source
Alosa aestivalis	Blueback herring	YOY	Pelagic	14	14	21	25.5	27				No spawning at intolerant	Jones et al., 1978, p.77
Alosa pseudoharengus	Alewife	YOY	Pelagic			26.3	26.3						Fay et al., 1983, p.17
Alosa sapidissima	American shad	Eggs	Pelagic	7	22	12	17			7	22		Weiss-Glanz et al., 1986, p.10
Alosa sapidissima	American shad	Adult	Pelagic			7	13	2					Weiss-Glanz et al., 1986, p.10
Anarhichas lupus	Atlantic wolffish	Adult	Demersal	0	13	3	6					SS fish	Scott, 1982, p.34
Anarhichas lupus	Atlantic wolffish	Adult	Demersal	-1	10	-0.4	6						Odea and Haedrich, 2002, p.427
Anarhichas lupus	Atlantic wolffish	Juvenile	Demersal			9	11						McCarthy et al., 1998, p.216
Anarhichas minor	Spotted wolffish	Juvenile	Demersal			11.5	11.5					Optimum growth	Hansen and Faulk-Petersen, 2002, in Imsland et al., 2006, p.1108
Apeltes quadracus	Fourspine stickleback	Juvenile and adult	Pelagic	5	22							In an NB estuary	Delbeek and Williams, 1987, in Collette and Klein-MacPhee, 2002, p.313
Arctica islandica	Ocean quahog		Infaunal	0.1	21.4								Lutz et al., 1983, abstract
Brevoortia tyrannus	Atlantic menhaden		Pelagic	10	30								Collette and Klein-MacPhee, 2002, p.134
Brevoortia tyrannus	Atlantic menhaden	Juvenile	Pelagic							4	33		Lewis and Hettler, 1968, p.347, 349
Cancer irroratus	Rock crab	Molting to larval	Pelagic			15	15						Bigford, 1979, p.4
Cancer irroratus	Rock crab	Postlarval	Pelagic			15	15
Cancer irroratus	Rock crab	Molting to postlarval	Pelagic			15	15
Cancer irroratus	Rock crab	Molting to postlarval	Pelagic
Carcinus maenas	Green crab		Benthic	0	35	3	26						Klassen and Locke, 2007, p.24
Chionoecetes opilio	Snow crab		Benthic	-1	4								Pohle, 1990, p.17
Clupea harengus	Atlantic herring	Larvae	Pelagic	-1.8	24							NS fish	Stevenson and Scott, 2005, Table 7
Clupea harengus	Atlantic herring	Juvenile	Pelagic	4	16	8	12			19.5		50% die at lethal	Stevenson and Scott, 2005, Table 7
Clupea harengus	Atlantic herring	Adult	Pelagic	0	11	7	9					SS fish	Scott, 1982, p.34
Clupea harengus	Atlantic herring	Adult	Pelagic			5	9					GB fish	Stevenson and Scott, 2005, Table 7
Crangon septemspinosa	Sand shrimp	Juvenile	Benthic	4	23.5							In Kouchibouguac River Estuary	Locke et al., 2005, p.605
Crassostrea virginica	American oyster		Benthic	-1.7	36	20	30			48.5			Sellers and Stanley, 1984, p.9
Cyclopterus lumpus	Lumpfish	40-day larva										No data available
Cyclopterus lumpus	Lumpfish	36-day egg	Pelagic	3.8	9.8								Collins, 1978, p.170
Cyclopterus lumpus	Lumpfish	76-day larva										No data available
Cynoscion regalis	Weakfish	Juvenile	Pelagic			17.2	28						Mercer, 1989, p.11
Dyspanopeus sayi	Say's mud crab	All	Pelagic	0	33								Breen and Metaxas, 2009, Table 1
Fundulus heteroclitus	Mummichog	Adult	Pelagic	6	35	13	29						Targett, 1979, p.179
Gadus morhua	Atlantic cod	Adult	Demersal	0	17	0	10						Lough, 2004, Appendix 1
Gadus morhua(SS)	Atlantic cod	Adult	Demersal	0	13	3	7						Scott, 1982, p.33
Gadus ogac/Uvak	Greenland cod		Demersal	3	20							In James Bay	Morin et al., 1991, abstract
Glyptocephalus cynoglossus	Witch flounder		Demersal	0	13	5	7						Scott, 1982, p.37
Glyptocephalus cynoglossus	Witch flounder		Demersal	-1	14.5	7	8					Bay of Fundy pref. temp	Cargnelli et al., 1999, Table 3
Hippoglossus hippoglossus	Atlantic halibut		Demersal	1	13	4	8						Scott, 1982, p.33
Homarus americanus	American lobster	Molting to larval	Pelagic			17	17			5			MacKenzie, 1985, p.11
Homarus americanus	American lobster	Postlarval	Pelagic	6	25							12 required for proper development to postlarval	Harding, 1992, p.5
Homarus americanus	American lobster	Juvenile	Benthic	-1	30.5								MacKenzie, 1985, p.11
Homarus americanus	American lobster	Adult	Benthic	-1	30.5	8	14						MacKenzie, 1985, p.11
Hyperoglyphe perciformis	Rudder-fish											No data available
Ilyanassa obsoleta	Eastern mudsnail	Veliger										No data available
Mercenaria Mercenaria	Hard clam	Embryo	Pelagic							15	33		Stanley and Dewitt, 1983, p.10
Mercenaria Mercenaria	Hard clam	Larvae	Pelagic	13	30	19	29.5					Max growth at pref. temp	Stanley and Dewitt, 1983, p.10
Mercenaria Mercenaria	Hard clam	Adult	Infaunal	-6	35								Stanley and Dewitt, 1983, p.10
Merluccius bilinearis	Silver hake	Adult	Demersal	1	13	7	10					SS fish	Scott, 1982, p.36
Merluccius bilinearis	Silver hake	Juvenile	Demersal	1	17	6	14						Morse et al., 1999, p.3
Mnemiopsis leidyi	Sea walnut	Small and large	Pelagic	0	32								Purcell et al., 2001, p.170
Morone saxatalis	Striped bass	Juvenile	Pelagic	10	27	16	19	10					Fay et al., 1983, p.21
Morone saxatalis	Striped bass	Adult	Pelagic	6	25								Setzler et al., 1980; Coutant, 1986, in Collette and Klein-MacPhee, 2002, p.379
Morone saxatalis	Striped bass	Larvae	Pelagic	13	22								Setzler et al., 1980; Coutant, 1986, in Collette and Klein-MacPhee, 2002, p.379
Mugil cephalus	Striped mullet	Juvenile	Pelagic	5	37								Collette and Klein-MacPhee, 2002, p.278
Mya arenaria	Soft-shell clam		Infaunal					-1.7					Newell and Hidu, 1986, p.10
Mytilus edulis	Blue mussel		Benthic			5	23.5					Tpref = temp for calcification	Malone and Dodd, 1967, p.432
Palaemonetes pugio	Daggerblade grass shrimp	Molting to larval	Pelagic	15	35	20	30						Anderson, 1985, Table 5
Palaemonetes pugio	Daggerblade grass shrimp	Juvenile										No data available
Palaemonetes pugio	Daggerblade grass shrimp	Adult	Benthic	5	38	18	25						Anderson, 1985, p. 9
Palaemonetes vulgaris	Marsh grass shrimp	Molting to larval	Pelagic	20	30	20	20						Anderson, 1985, Table 5
Palaemonetes vulgaris	Marsh grass shrimp	Postlarval										No data available
Palaemonetes vulgaris	Marsh grass shrimp	Juvenile										No data available
Pandalus borealis	Northern shrimp	Larvae	Pelagic			3	6						Chabot et al., 2013, p.126
Pandalus borealis	Northern shrimp	Larvae	Pelagic			3	9						Bergstrom, 2000, pp. 154-155
Pandalus borealis	Northern shrimp	Larvae	Pelagic	-1.8	18							Experimental	Shumway et al., 1985, p.22
Pandalus borealis	Northern shrimp	Adult	Benthic			-1	8						Garcia, 2007, p.153-154
Pandalus borealis	Northern shrimp	Adult	Benthic	-1.6	12	0	5						Shumway et al., 1985, p.4
Pandalus borealis	Northern shrimp	Adult	Benthic	-1.68	11.13							Observational	Allen, 1959, Fig.3, p.193
Paralichthys dentatus	Summer flounder	Adult	Demersal	2	27								Packer et al., 1999, pp.17-18
Paralichthys dentatus	Summer flounder	Juvenile	Demersal	2	30	21	21						Peters and Angelovic, 1971
Peprilus triacanthus	Butterfish	Adult	Pelagic	4.4	26			10				Reduced survival <10	Cross et al., 1999, Table 1
Peprilus triacanthus	Butterfish	Juvenile	Pelagic	4.4	29.7			10				Reduced survival <10	Cross et al., 1999, Table 1
Placopecten magellanicus	Deep sea scallop	Adult	Benthic			10	15			21	24		Stewart and Arnold, 1994, p.8
Placopecten magellanicus	Deep sea scallop	Adult	Benthic			10	10			20	24		Mullen and Moring, 1986, p.10
Placopecten magellanicus	Deep sea scallop	Adult	Benthic	-1	18								Barbeau and Scheibling, 1994
Prionotus carolinus	Northern sea robin		Pelagic	4	28								McBride and Able, 1994, in Colette and Klein-MacPhee, 2002, p. 341
Prionotus carolinus	Northern sea robin	Juvenile										No data available
Pseudopleuronectes americanus	Winter flounder	Juvenile	Demersal	10	25							Summer and fall temp	Pereira et al., 1999, Table 1
Pseudopleuronectes americanus	Winter flounder	Eggs	Demersal			3	5				18		Pereira et al., 1999, Table 1
Pseudopleuronectes americanus	Winter flounder	Larvae	Demersal	2	15							Most abundant at this temp	Pereira et al., 1999, Table 1
Pseudopleuronectes americanus	Winter flounder	YOY	Demersal	2	29.4	19.5	19.5			30			Pereira et al., 1999
Pseudopleuronectes americanus	Winter flounder	Adult	Demersal	2	12	6	9						Scott, 1982, p.37
Pseudopleuronectes americanus	Winter flounder	Adult	Demersal	0.6	23	12	15				27		Pereira et al., 1999, Table 1
Pseudopleuronectes americanus	Winter flounder	Adult	Demersal	0	25			30					Buckley, 1989, p.8
Pseudopleuronectes americanus	Winter flounder	Eggs	Demersal			0	10			0	10		Buckley, 1989, p.8
Raja erinacea	Little skate		Benthic	1.2	21	2	15						McReachran and Musick, 1975, p. 119
Raja erinacea	Little skate		Benthic	4	11	5	10					SS region	Scott, 1982, p.35
Reinhardtius hippoglossoides	Greenland halibut	Juvenile										No data available
Reinhardtius hippoglossoides	Greenland halibut	Adult	Demersal	1	7	1	5					SS fish	Scott, 1982, p.35
Salmo salar	Atlantic salmon	Post-smolts	Pelagic	0	20	8	15						DFO and MRNF, 2008, p.34
Salmo salar	Atlantic salmon	Adult	Pelagic	2	28	4	10	20	27			At intol, lose disease resistance	Danie et al, 1984, p.12
Salmo salar	Atlantic salmon	Adult	Pelagic								25		DFO, 2012b (rep. 2012/019), p.4
Scomber scombrus	Atlantic mackerel	Adult	Pelagic	5	16	2							Studholme et al., 1999, Table 3
Scomber scombrus	Atlantic mackerel	Adult	Pelagic	0	11	7	10					SS fish	Scott, 1982, p.34
Scophthalmus aquosus	Windowpane	Juvenile	Demersal	0	24	5	23						Wilk et al., 1996 in Chang et al., 1999, p. 3
Scophthalmus aquosus	Windowpane	Adult	Demersal	0	26.8								Moore et al., 1947 in Chang et al., 1999, p. 3
Sphoeroides maculatus	Northern puffer	Adult	Demersal	10	34.1								Tagatz, 1967, in Sibunka and Pacheco, 1981 p. 10
Spisula solidissima	Atlantic surfclam	Adult	Infaunal	0	30				30	28			Fay et al, 1983, p.14
Spisula solidissima	Atlantic surfclam	Juvenile	Infaunal					4					Fay et al, 1983, p.14
Streblospio benedicti	Spionid polychaete											No data available
Tautoga onitis	Tautog	Adult	Demersal								31		Arendt et al. 2001;Pearce 1969;McCormack 1976,in Collette and Klein-Macphee,2002,p.451
Tautoga onitus	Tautog	Juvenile	Demersal	2									Hales and Able, 2001, in Able and Fahay, 2010, p.415
Tautogolabrus adspersus	Cunner		Demersal	0	23								Green and Farwell 1971, in Collette and Klein-Macphee, 2002, p.460
Urophycis chuss	Red hake	Juvenile	Demersal	2	22	3	16	3	22				Steimle et al., 1999, Table 1
Urophycis chuss	Red hake	Adult	Demersal	2	22	8	10	5					Steimle et al., 1999, Table 1
Urophycis chuss	Red hake	Adult	Demersal	3	11	5	10					SS fish	Scott, 1982, p.36
